# Supplementary material for: A novel nanocomposite material C3F7-azo+/Ti4O92− was prepared as a sensor for the detection of ascorbic acid and uric acid
Source: Royal Society of Chemistry journal article supplement (doi:10.1039/d3nj03612j), 2023-01-01
Supplement: d3nj03612j1.pdf [file d3nj03612j1.pdf]

# A novel nanocomposite material $C_3F_7\text{-azo}^+/\text{Ti}_4\text{O}_9^{2-}$ was prepared as a sensor for the detection of ascorbic acid and uric acid

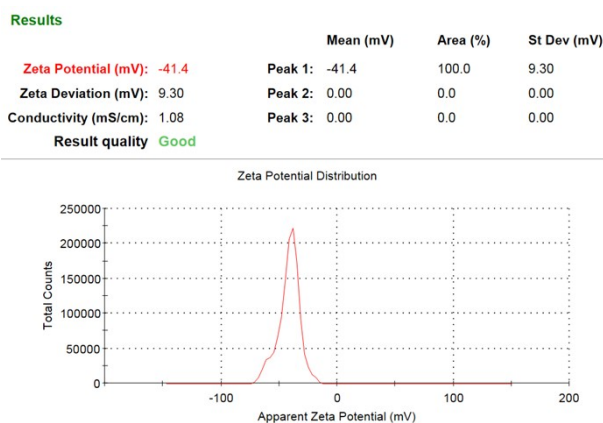

Fig. S1. Zeta potential analysis of  $\text{Ti}_4\text{O}_9^{2-}$  nanosheets

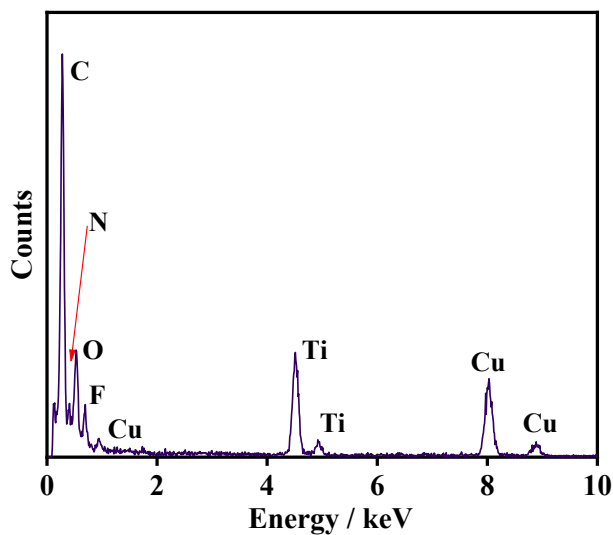

Fig. S2 EDS diagram of nanocomposite  $C_3F_7\text{-azo}^+/\text{Ti}_4\text{O}_9^{2-}$

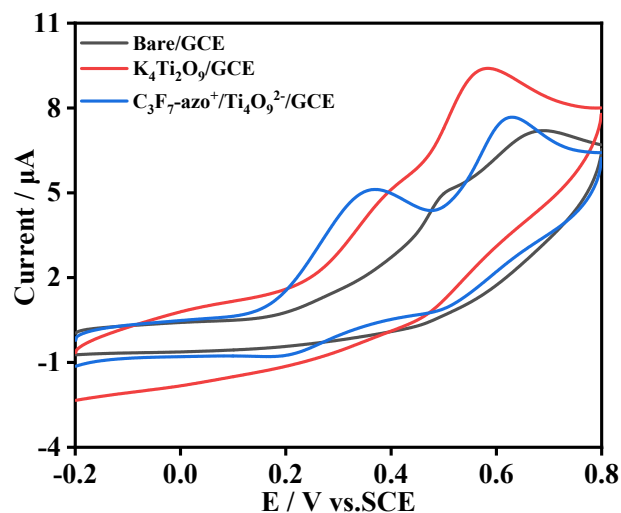

Fig. S3. Bare/GCE,  $K_2Ti_4O_9$ /GCE and  $C_3F_7\text{-azo}^+/\text{Ti}_4O_9^{2-}$ /GCE CV curves at the scanning rate of 200 mV/s, solution:  $N_2$  saturated 0.1 M PBS (pH 4.5) with 12.5  $\mu\text{M}$  AA and 12.5  $\mu\text{M}$  UA.

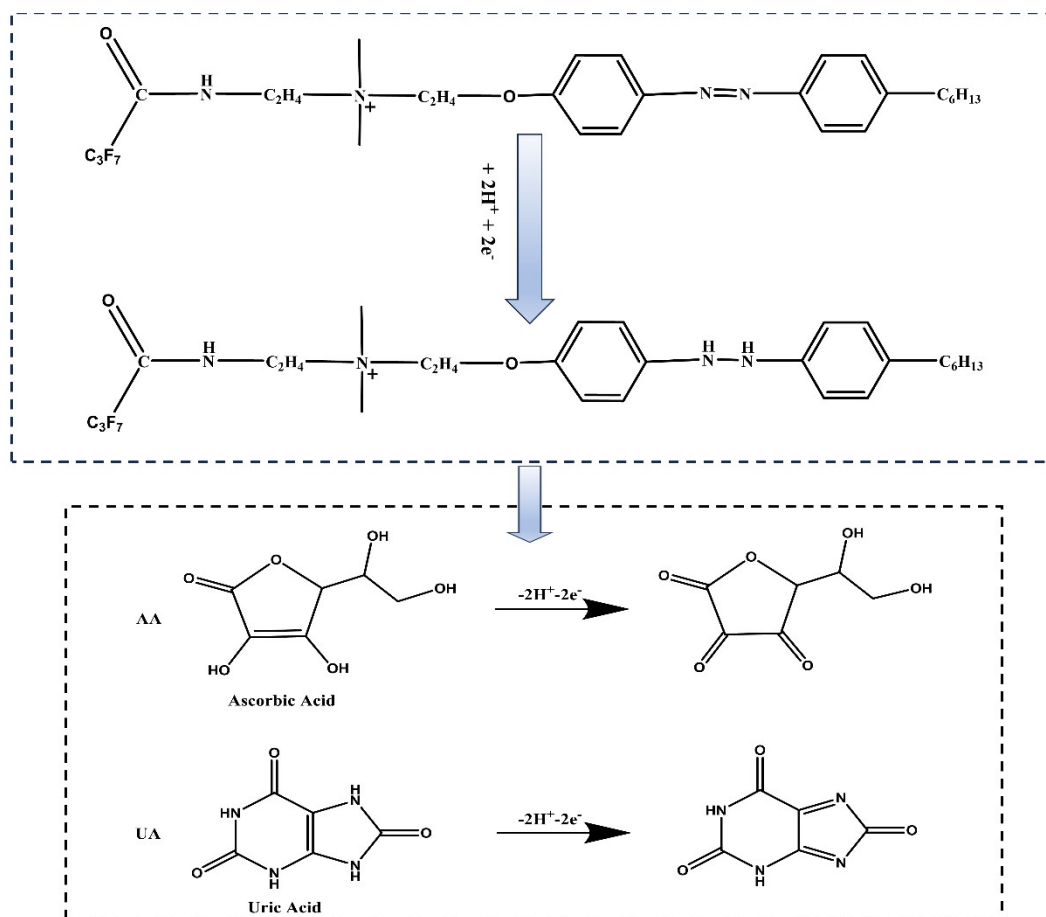

Fig. S4. Electrochemical oxidation mechanism of AA and UA.

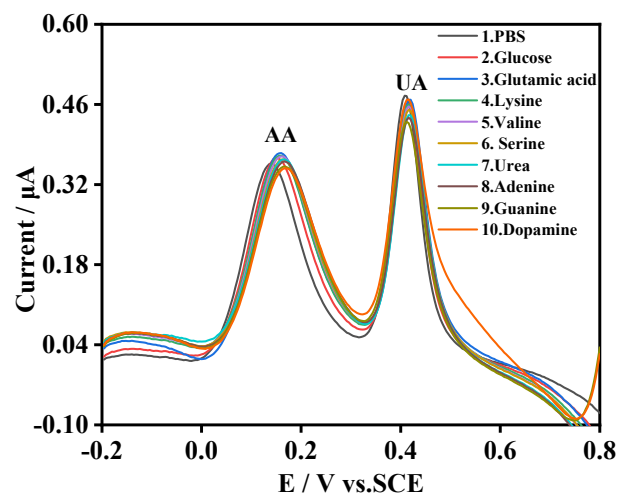

Fig. S5 DPV curves of anti-interference test.
